# Supplementary material for: Oncolytic adenovirus expressing bispecific antibody targets T‐cell cytotoxicity in cancer biopsies
Source: PubMed Central journal article supplement (PMC5538299; doi:10.15252/emmm.201707567), 2017-06-20
Supplement: EMMM-9-1067-s002.pdf [file EMMM-9-1067-s002.pdf]

## Expanded View Figures

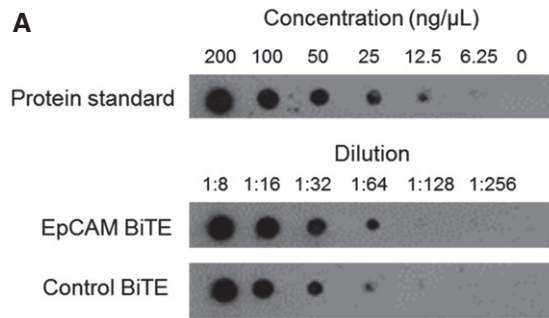**Figure EV1. Characterisation of recombinant EpCAM BiTE.**

A Dot blot to estimate the quantity of EpCAM BiTE produced by transfected HEK293A cells.

B ELISA measuring the level of EpCAM binding by controls or recombinant EpCAM or non-specific BiTE. Each condition was measured in biological triplicate and represented as mean  $\pm$  SD. Significance was assessed by comparison to empty vector control sample using a one-way ANOVA test with Tukey's *post hoc* analysis, \*\*\* $P$  < 0.001.

Source data are available online for this figure.

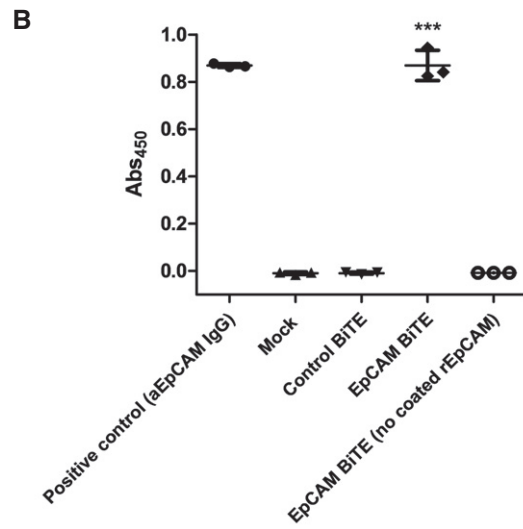

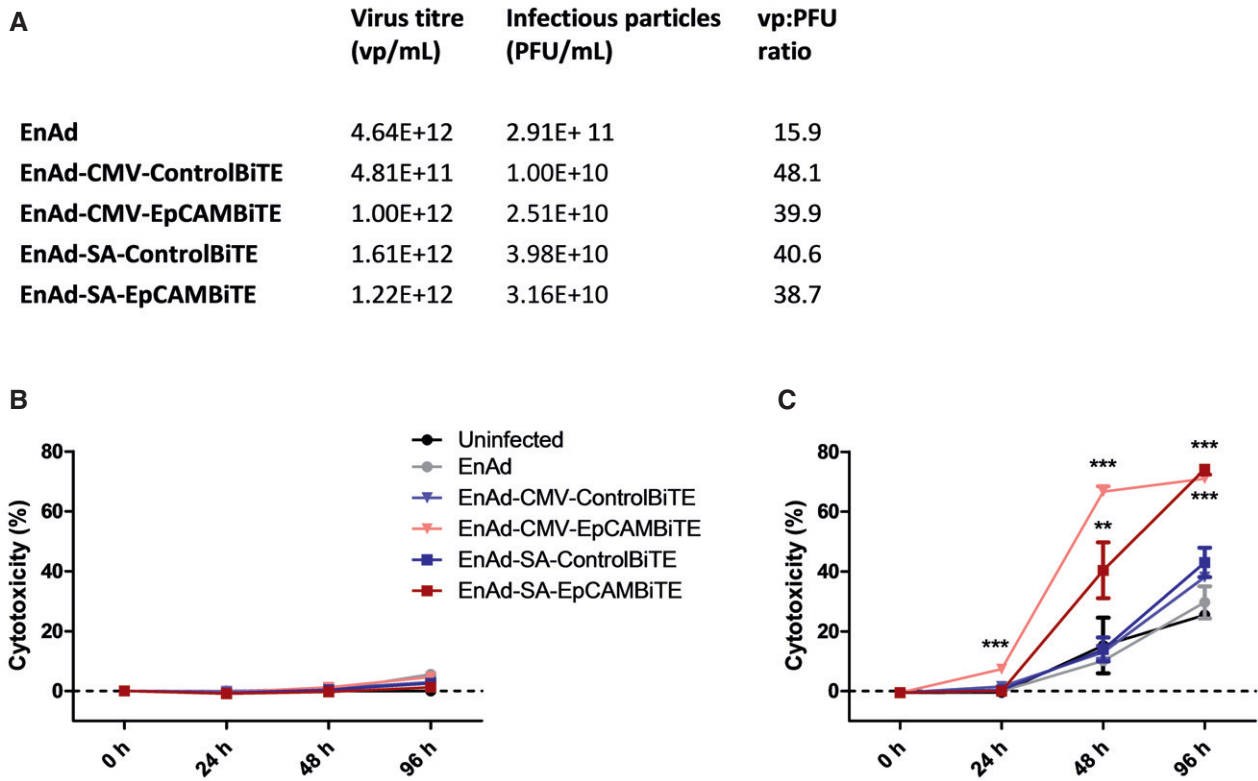

**Figure EV2. Cytotoxicity of EnAd expressing EpCAM BiTE in SKOV3 cells.**

A A quality control of viruses used in this study. The virus titre (vp/ml) was measured by PicoGreen assay and infectious particles (PFU/ml) by TCID50.  
 B, C SKOV3 cells were incubated with EnAd or recombinant viruses in the absence (B) or presence (C) of T cells and cytotoxicity was measured by LDH release at the specified time points. Each condition was measured in biological triplicate and represented as mean  $\pm$  SD. Significance was assessed by comparison to uninfected control wells using a one-way ANOVA test with Tukey's *post hoc* analysis, \*\* $P < 0.01$ , \*\*\* $P < 0.001$ .

Source data are available online for this figure.

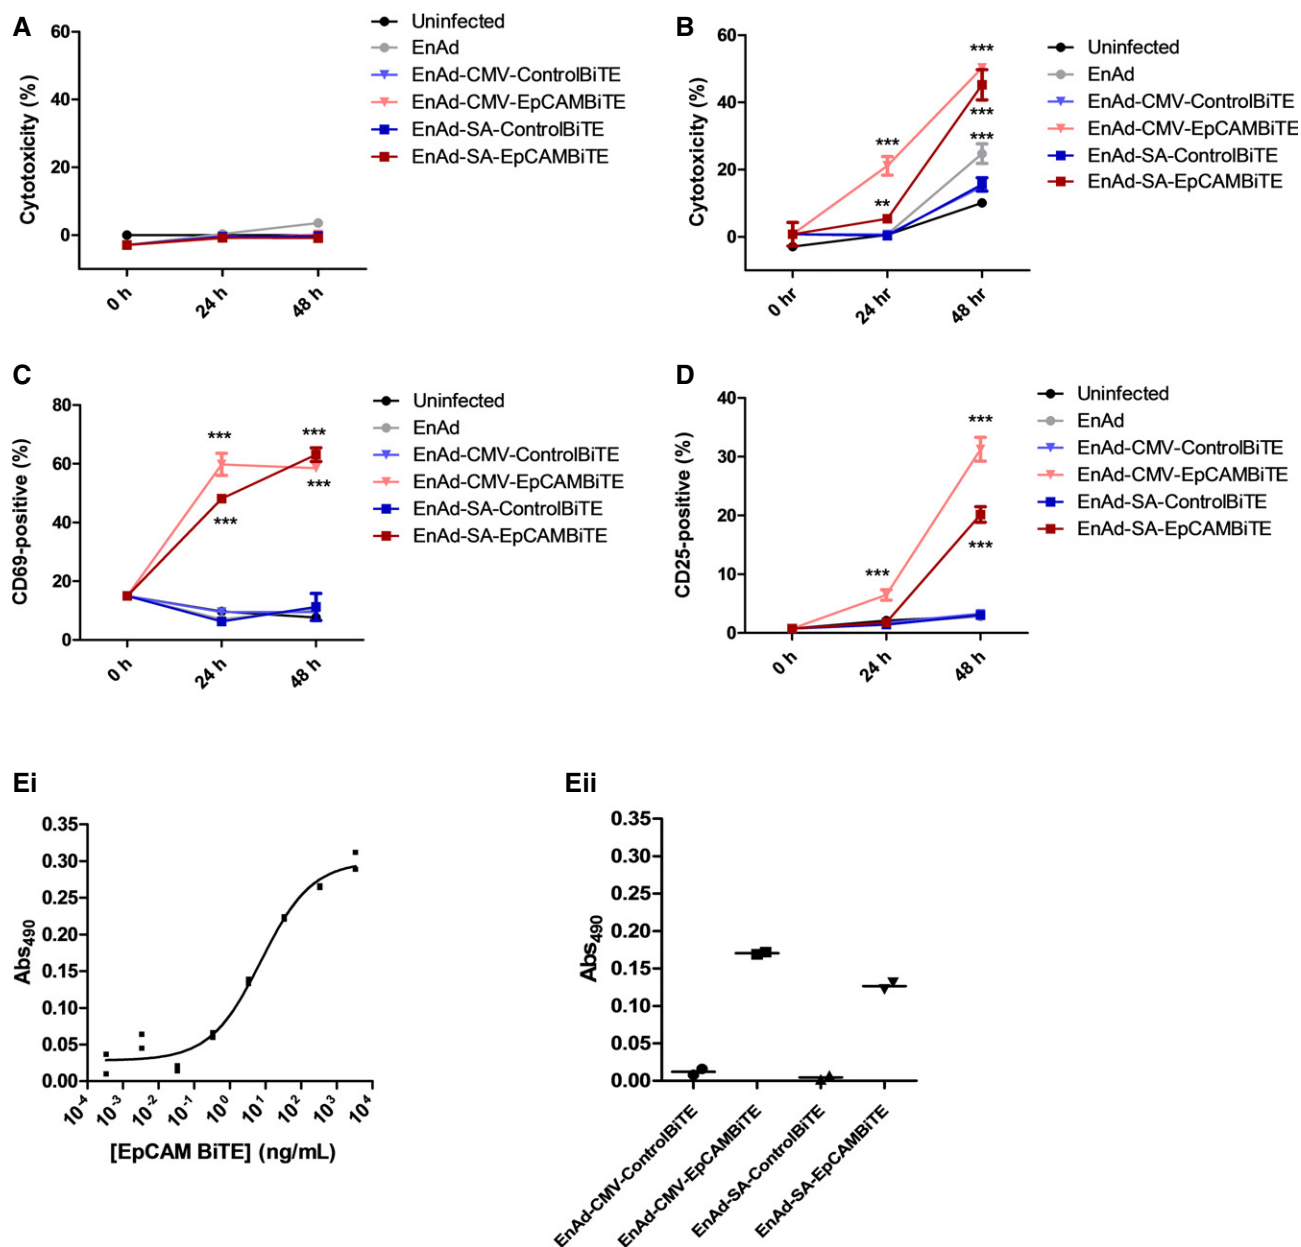

**Figure EV3. Cytotoxicity and T-cell activation by EnAd expressing EpCAM BiTE in DLD cells.**

A, B Cytotoxicity for infected DLD cells in the absence (A) or presence of T cells (B). DLD cells were infected and co-cultured with T cells, and cytotoxicity was measured by LDH release at the specified time points.

C, D T cells from (B) were harvested and stained for activation markers CD69 (C) or CD25 (D) and analysed via flow cytometry.

E Quantification of EpCAM BiTE produced from DLD cells infected with recombinant viruses. Standard curve of LDH released (Abs) of DLD cells in co-culture with CD3<sup>+</sup> cells and serial dilutions of a known quantity of recombinant EpCAM BiTE (Ei). In parallel, co-cultures were incubated with diluted supernatants (10,000-fold) from 3-day infected DLD cells (Eii). Standard curve allowed the approximate determination of EpCAM BiTE produced at 165 and 50  $\mu$ g per million DLD cells for EnAd-CMV-EpCAMBiTE and EnAd-SA-EpCAMBiTE, respectively.

Data information: Each condition was measured in biological triplicate (A–D) or duplicate (E) and represented as mean  $\pm$  SD (A–D). Significance was assessed by comparison to uninfected control wells using a one-way ANOVA test with Tukey's *post hoc* analysis, \*\* $P < 0.01$ , \*\*\* $P < 0.001$ . Source data are available online for this figure.

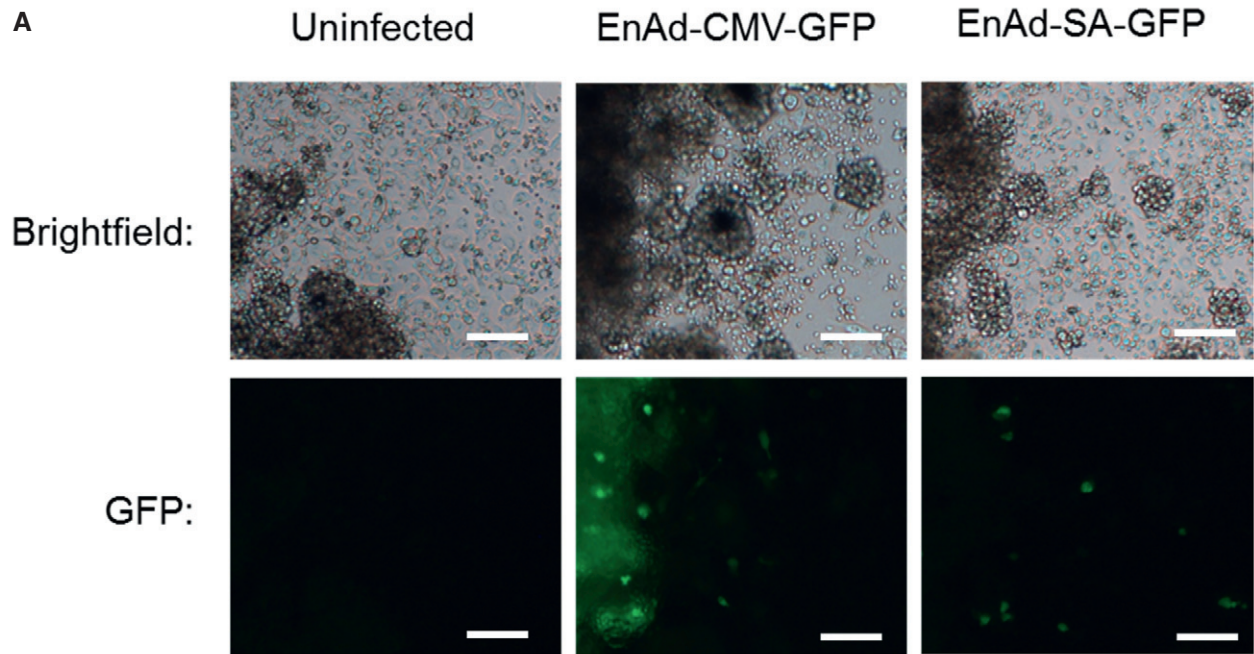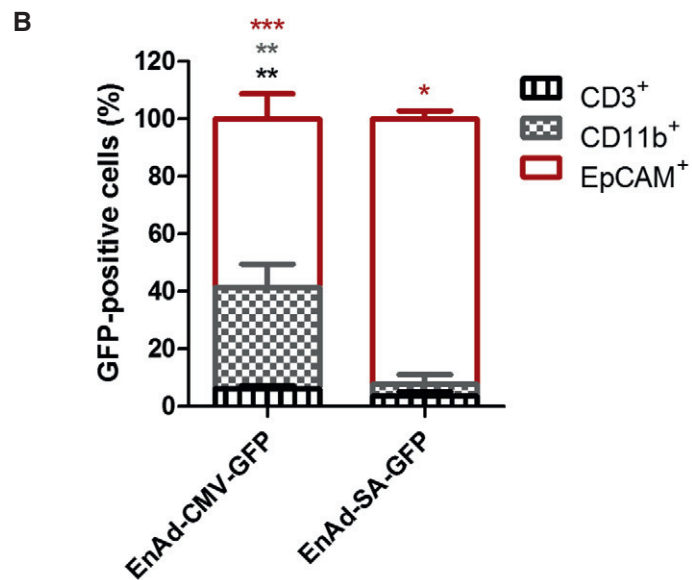

**Figure EV4. Replication (SA promoter)-dependent GFP transgene is selectively expressed in EpCAM<sup>+</sup> tumour cells.**

A, B Total cells from a peritoneal ascites sample were incubated with EnAd-CMV-GFP or EnAd-SA-GFP, with uninfected cells serving as a negative control. After 3 days, wells were imaged by bright-field or fluorescence microscopy. Original magnification  $\times 10$ ; scale bar, 100  $\mu\text{m}$  (A). Total cells were harvested, and the proportion of GFP<sup>+</sup> cells that were CD3<sup>-</sup>, CD11b<sup>-</sup> or EpCAM<sup>+</sup> determined using flow cytometry (B). Each condition was measured in biological quadruplicate and represented as mean  $\pm$  SD. Significance was assessed by comparison to uninfected control wells using a one-way ANOVA test with Tukey's *post hoc* analysis, \* $p < 0.05$ , \*\* $p < 0.01$ , \*\*\* $p < 0.001$ .

Source data are available online for this figure.

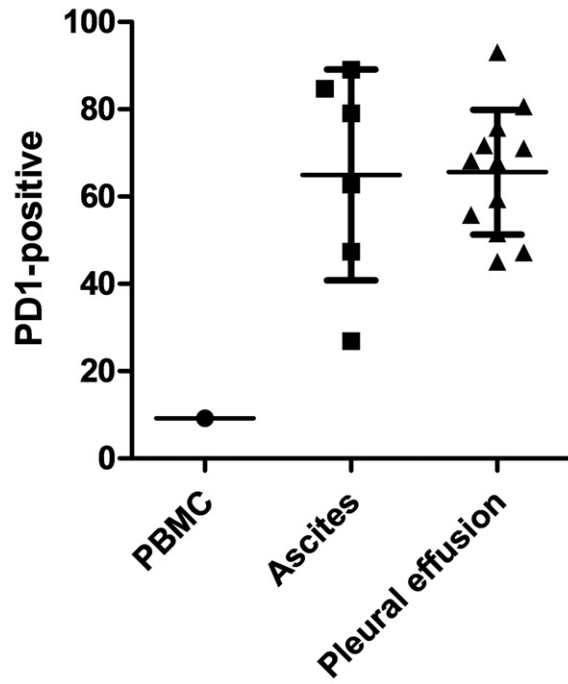

**Figure EV5. Expression of PD-1 on PBMC and malignant exudate T cells.**

The expression of PD-1 by endogenous T cells following their initial isolation from PBMC, ascites and pleural effusions was assessed by flow cytometry. PD-1 expression on CD3 cells within each donor sample was measured once and represented as mean  $\pm$  SD of all measured samples.

Source data are available online for this figure.
